# Supplementary material for: CRISPR/Cas9-Mediated Editing of AGAMOUS-like Genes Results in a Late-Bolting Phenotype in Chinese Cabbage (Brassica rapa ssp. pekinensis)
Source: MDPI journal article supplement (doi:10.3390/ijms232315009), 2022-11-30
Supplement: s1 [file s1]

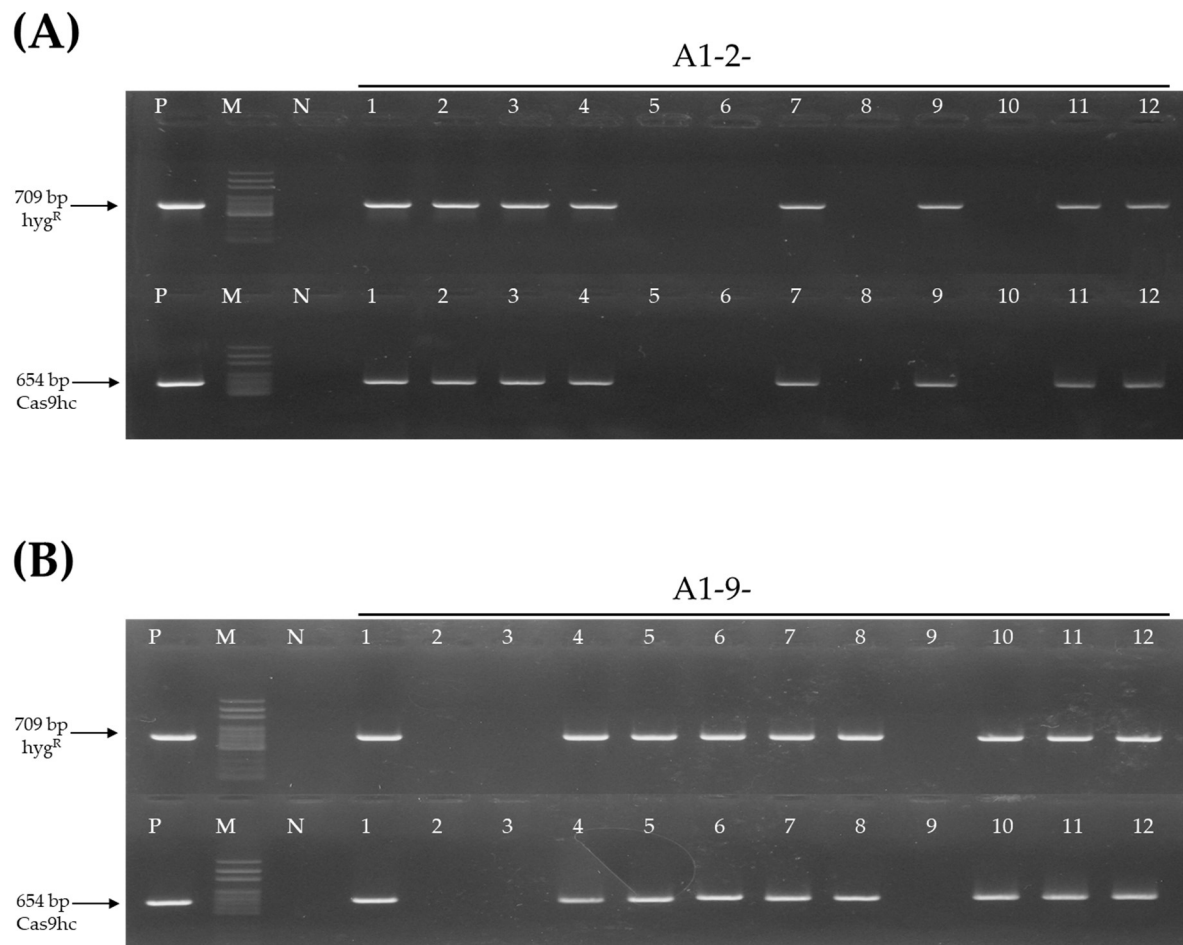

**Figure S1.** Selection of E<sub>1</sub> *AGL19*-edited lines using polymerase chain reaction (PCR) analysis. **(A)** PCR analysis with hyg<sup>R</sup> and Cas9hc primer sets of E<sub>1</sub> A1-2-edited lines. **(B)** PCR analysis with hyg<sup>R</sup> and Cas9hc primer sets of E<sub>1</sub> A1-9-edited lines. The 709 bp and 654 bp expected PCR products are indicated with an arrow, respectively. P, positive control; M, 100 bp DNA ladder; N, negative control; Numbering lane, gene-edited lines.

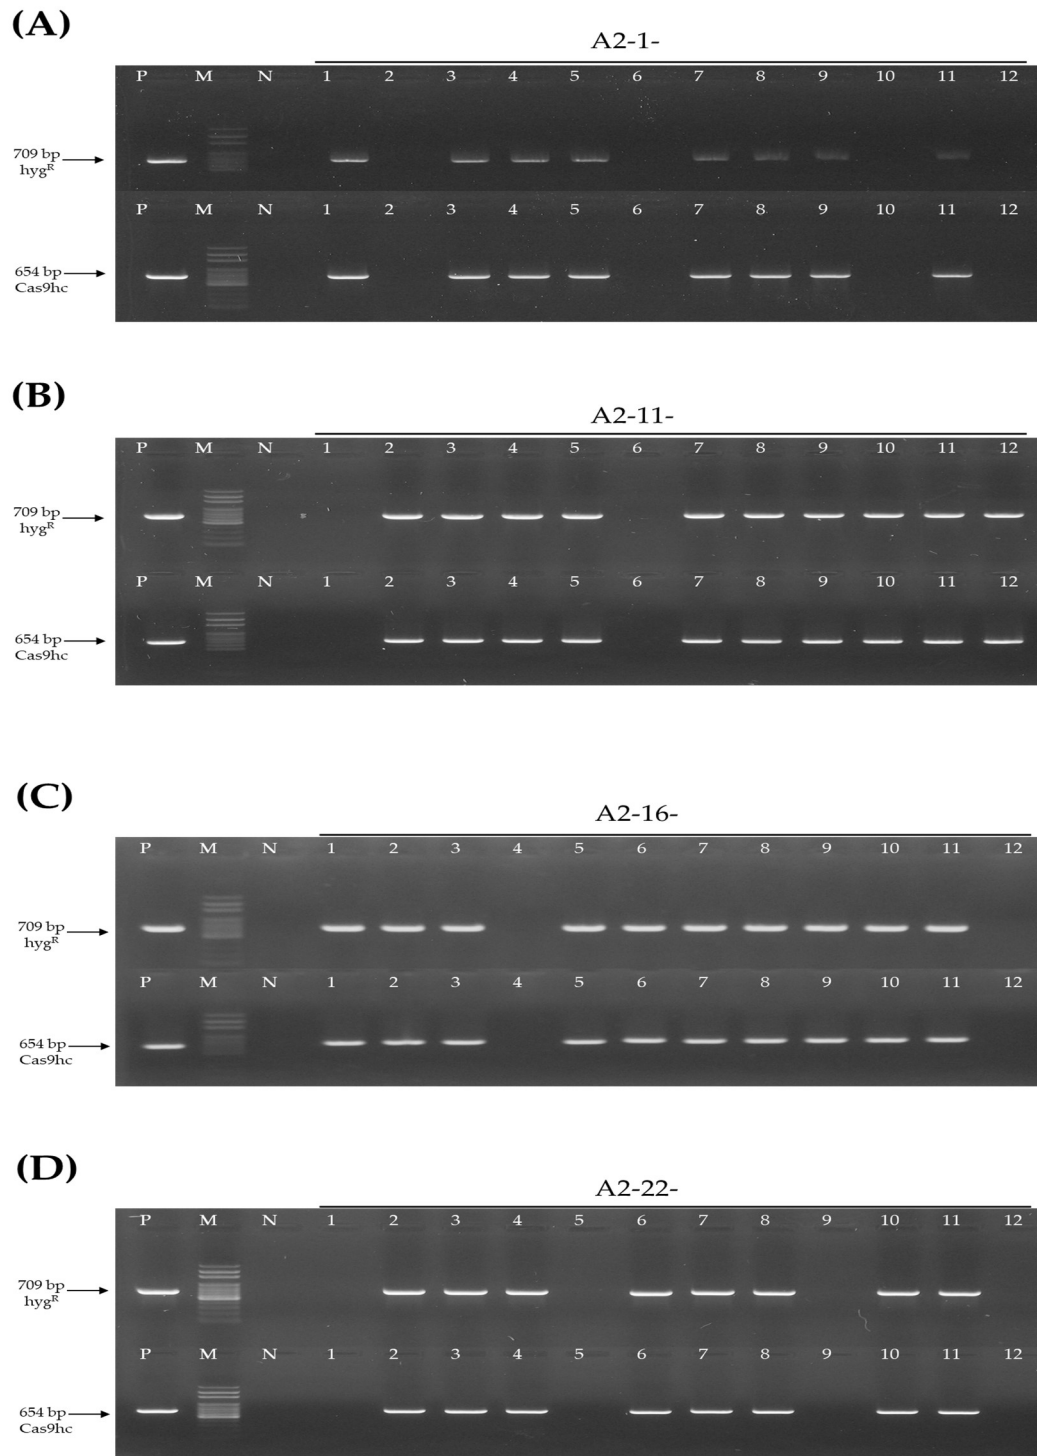

**Figure S2.** Selection of E<sub>1</sub> AGL24-edited lines using polymerase chain reaction (PCR) analysis. **(A)** PCR analysis with hyg<sup>R</sup> and Cas9hc primer sets of E<sub>1</sub> A2-1-edited lines. **(B)** PCR analysis with hyg<sup>R</sup> and Cas9hc primer sets of E<sub>1</sub> A2-11-edited lines. **(C)** PCR analysis with hyg<sup>R</sup> and Cas9hc primer sets of E<sub>1</sub> A2-16-edited lines. **(D)** PCR analysis with hyg<sup>R</sup> and Cas9hc primer sets of E<sub>1</sub> A2-22-edited lines. The 709 bp and 654 bp expected PCR products are indicated with an arrow, respectively. P, positive control; M, 100 bp DNA ladder; N, negative control; Numbering lane, gene-edited lines.

**Table S1.** List of primer sets for polymerase chain reaction (PCR) analysis.

| Name                     | Primer         | Sequence (5'→3')              | Expected product size (bp) |
|--------------------------|----------------|-------------------------------|----------------------------|
| <b>Hyg<sup>R</sup></b>   | F <sup>z</sup> | CGT CTG CTG CTC CAT ACA AG    | 709                        |
|                          | R              | TGT CGA GAA GTT TCT GAT CGA   |                            |
| <b>Cas9<sup>hc</sup></b> | F              | CCG CCA GGA GGA CTT CTA CC    | 654                        |
|                          | R              | ATG TTC TCG GGC TTG TGG CG    |                            |
| <b>CT001_A03121400</b>   | F              | GGA GTT TCT TGG ATT GTC TTG G | 297                        |
|                          | R              | GTT GTC AAA ATC TCA GGA GAG G |                            |
| <b>CT001_A08282630</b>   | F              | GAA GAA ATT GAT AAG CTG AAG   | 476                        |
|                          | R              | TTT CTT GGA TTG TCT TGG CT    |                            |
| <b>CT001_A03122450</b>   | F              | AAA CCA CAC ATG CAA AGT CG    | 1381                       |
|                          | R              | GCT GAT GAA CTT TCG GTT CT    |                            |
| <b>CT001_A01013460</b>   | F              | ATG GCG AGA GAG AAG ATA AG    | 318                        |
|                          | R              | CTC CGA GCC CAA GAA TAA ATT   |                            |

<sup>z</sup>: F, forward primer; R, reverse primer.

**Table S2.** List of degenerate primers for variable argument-thermal asymmetric interlaced polymerase chain reaction (VA-TAIL PCR) analysis.

| Target domain                   | Name                      | Sequence (5'→3')                   | Variable argument <sup>z</sup> |
|---------------------------------|---------------------------|------------------------------------|--------------------------------|
| <b>Zinc finger protein LSD1</b> | <b>BrAD1</b> <sup>y</sup> | GAM RTG NCT VAM WTT G <sup>x</sup> | 192                            |
|                                 | <b>BrAD2</b>              | DTA ASA TGN HNT TGC T              | 288                            |

<sup>z</sup>: The number of primer combinations of AD primers.

<sup>y</sup>: BrAD primers are degenerate primers.

<sup>x</sup>: Mixed bases. M = A/C; R = A/G; V : A/C/G; W : A/T; D = A/G/T; S : G/C; H = A/C/T; N = any base.

**Table S3.** List of nested long T-DNA-specific primers for variable argument-thermal asymmetric interlaced polymerase chain reaction (VA-TAIL PCR) analysis.

| Primer | Sequence (5'→3')                                    | GC%  | TM(°C) |
|--------|-----------------------------------------------------|------|--------|
| LSP1   | ATA GTG GAA ACC GAC GCC <u>CCA GCA</u> <sup>z</sup> | 58.3 | 66.6   |
| LSP2   | <u>CCA GCA</u> CTC GTC CGA GGG CAA AG               | 65.2 | 66.8   |
| RSP1   | AAA GTA TAC CCC TAC GAC GTG <u>CCC G</u>            | 56.0 | 63.8   |
| RSP2   | <u>GCC CGA</u> CTA CGC CTA ACA CCC AG               | 65.2 | 66.2   |

<sup>z</sup>: Underlined nucleotide sequences indicate the overlapping sequence.
